# Supplementary material for: A background-subtraction strategy leads to ratiometric sensing of oxygen without recalibration
Source: Royal Society of Chemistry journal article supplement (doi:10.1039/c8an00967h), 2018-01-01
Supplement: c8an00967h1.pdf [file c8an00967h1.pdf]

## Supporting information for

# A background-subtraction strategy leads to ratiometric sensing of oxygen without recalibration

Yinglu Zhang, Longjiang Ding, Wei Zhang, Xiao-ai Zhang, Ying Lian and Xu-dong Wang\*

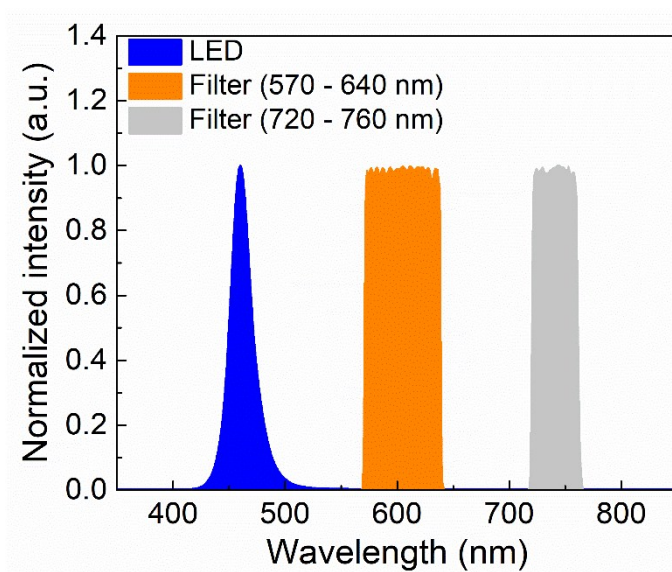

Fig. S1 The spectra of LED and two filters.

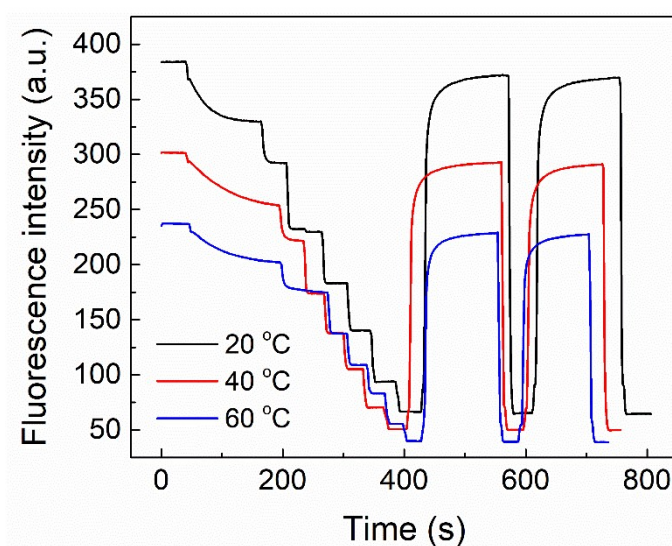

Fig. S2 The response of oxygen sensor in different concentrations of oxygen at three different temperatures.
